# Supplementary material
Source: Research Square preprint supplement (doi:10.21203/rs.3.rs-9858017/v1)
Supplement: Supplementary file 1 [file d48ea27d0f22485d7800ff0d.docx]

# SUPPLEMENTS: Polygenic risk for depression is associated with neural stress responses and sex-specific stress adaptation

**Marina Giglberger, PhD1┿, Gina-Isabelle Henze, PhD2,3┿,** Christoph Bärtl, PhD2,3, Hannah L. Peter, PhD1, Julian Konzok, PhD1, Sandra Zänkert, PhD4, Peter Kirsch, PhD5,6, Josef Frank, Dipl.-psych.7, Brigitte M. Kudielka, PhD1, Henrik Walter, MD, PhD2,3, Fabian Streit5,8,9, **Stefan Wüst, PhD1***

1 Institute of Psychology, University of Regensburg, Regensburg, Germany

2 Department of Psychiatry and Neurosciences CCM, Charité - Universitätsmedizin Berlin, Corporate Member of Freie Universität Berlin and Humboldt-Universität zu Berlin, Berlin, Germany

3 German Center for Mental Health (DZPG), Partner Site Berlin - Potsdam, Berlin, Germany

4 ZB MED – Information Center for Life Sciences, Cologne, Germany

5 German Center for Mental Health (DZPG), Partner Site Mannheim - Heidelberg - Ulm, Mannheim, Germany

6 Department of Clinical Psychology, Central Institute of Mental Health, Medical Faculty Mannheim, University of Heidelberg, Heidelberg, Germany

7 Department of Genetic Epidemiology in Psychiatry, Central Institute of Mental Health, Medical Faculty Mannheim, Heidelberg University, Mannheim, Germany

8 Department of Psychiatry and Psychotherapy, Central Institute of Mental Health, Medical Faculty Mannheim, Heidelberg University, Mannheim, Germany

9 Hector Institute for Artificial Intelligence in Psychiatry, Central Institute of Mental Health, Medical Faculty Mannheim, Heidelberg University, Mannheim, Germany

**Running title:** Genetic depression risk and neural stress response

┿ Both authors contributed equally to this paper

*Correspondence concerning this article should be addressed to:

Stefan Wüst, Institute of Psychology, Universitätsstraße 31, 93053 Regensburg, Germany

E-Mail: [Stefan.wuest@ur.de](mailto:Stefan.wuest@ur.de)

Phone: +49 941 943 5646 | Fax: +49 941 943 5641

### Distributions of parameters

### Distribution of polygenic score for depression


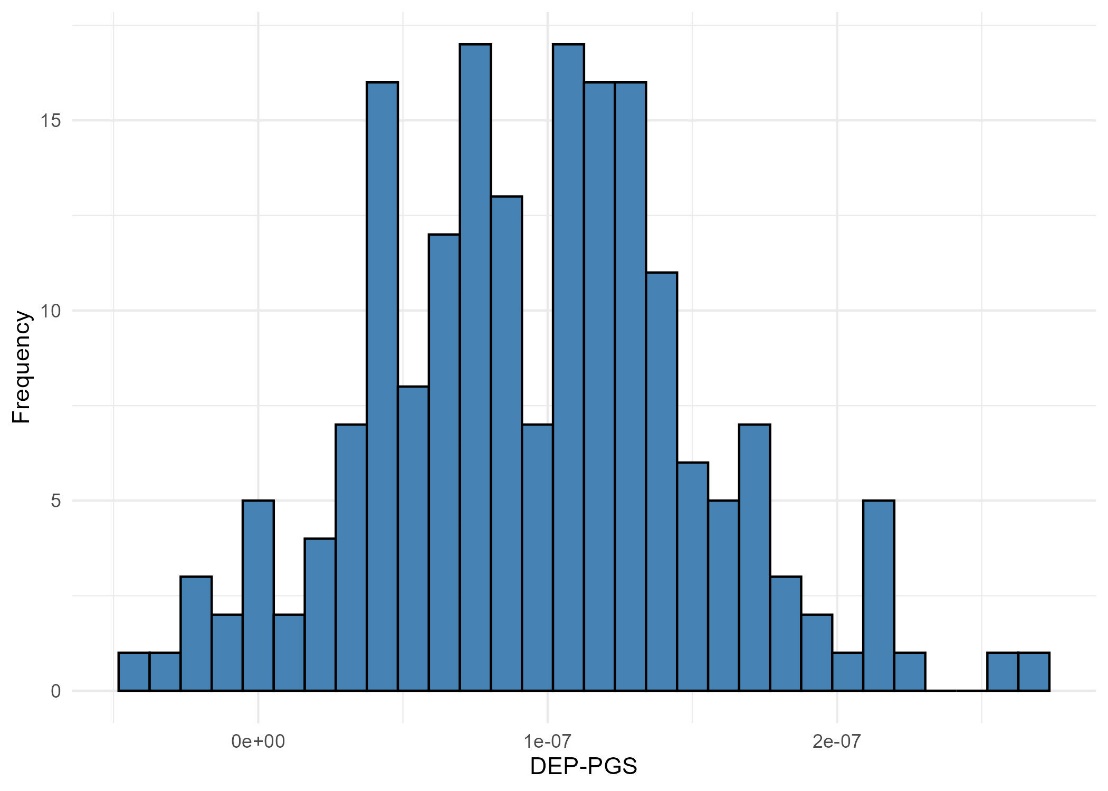


Figure S1. Histogram of the polygenic score for depression.


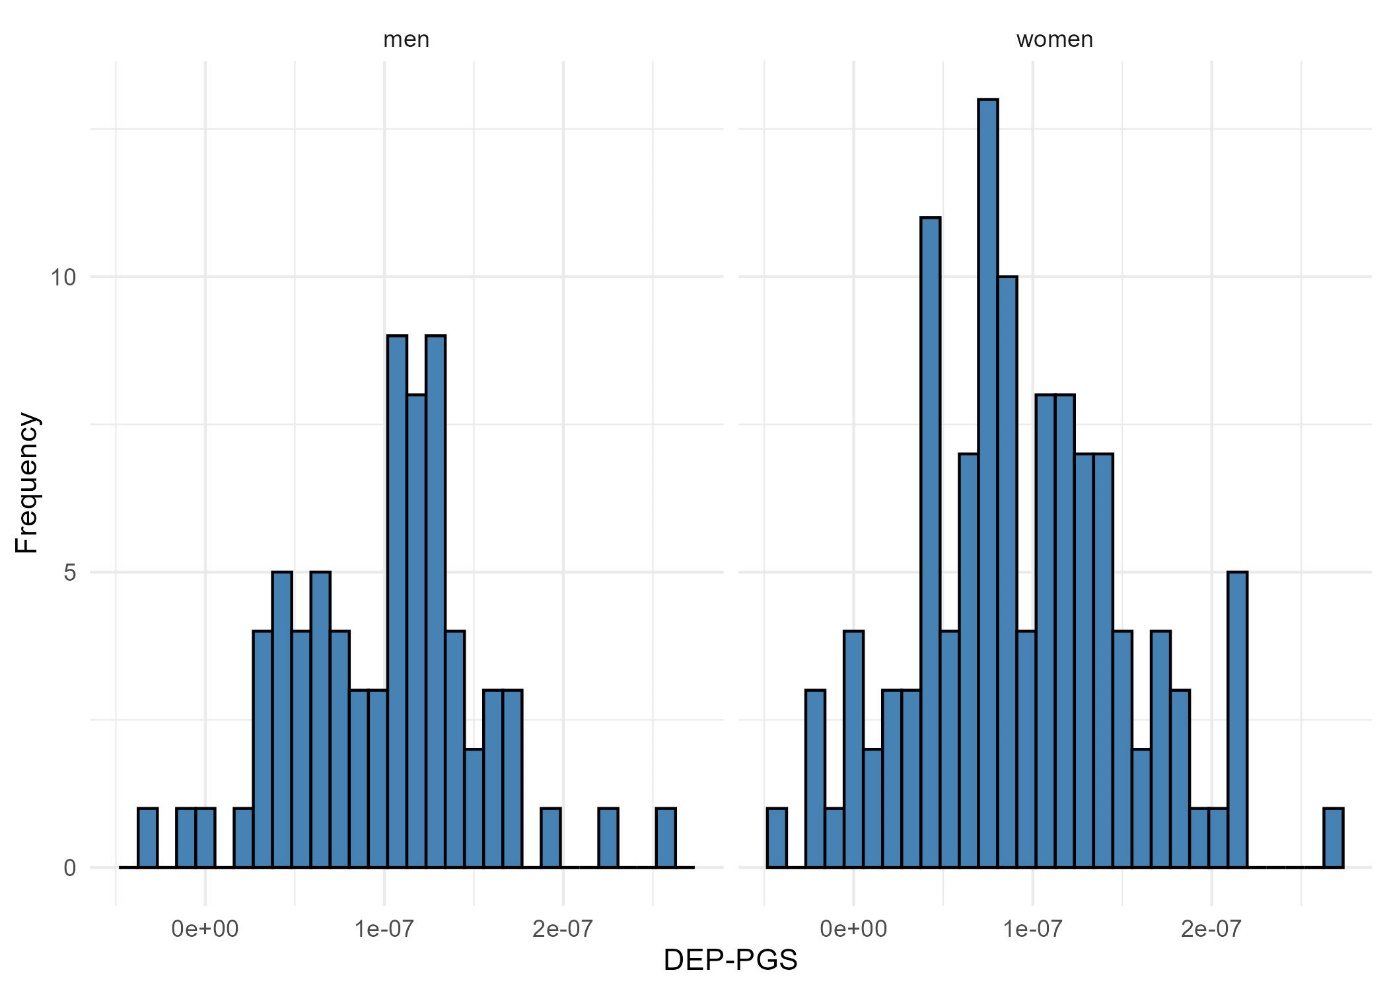


Figure S2. Histogram of the polygenic score for depression divided by sex.

### Distribution of depression scores


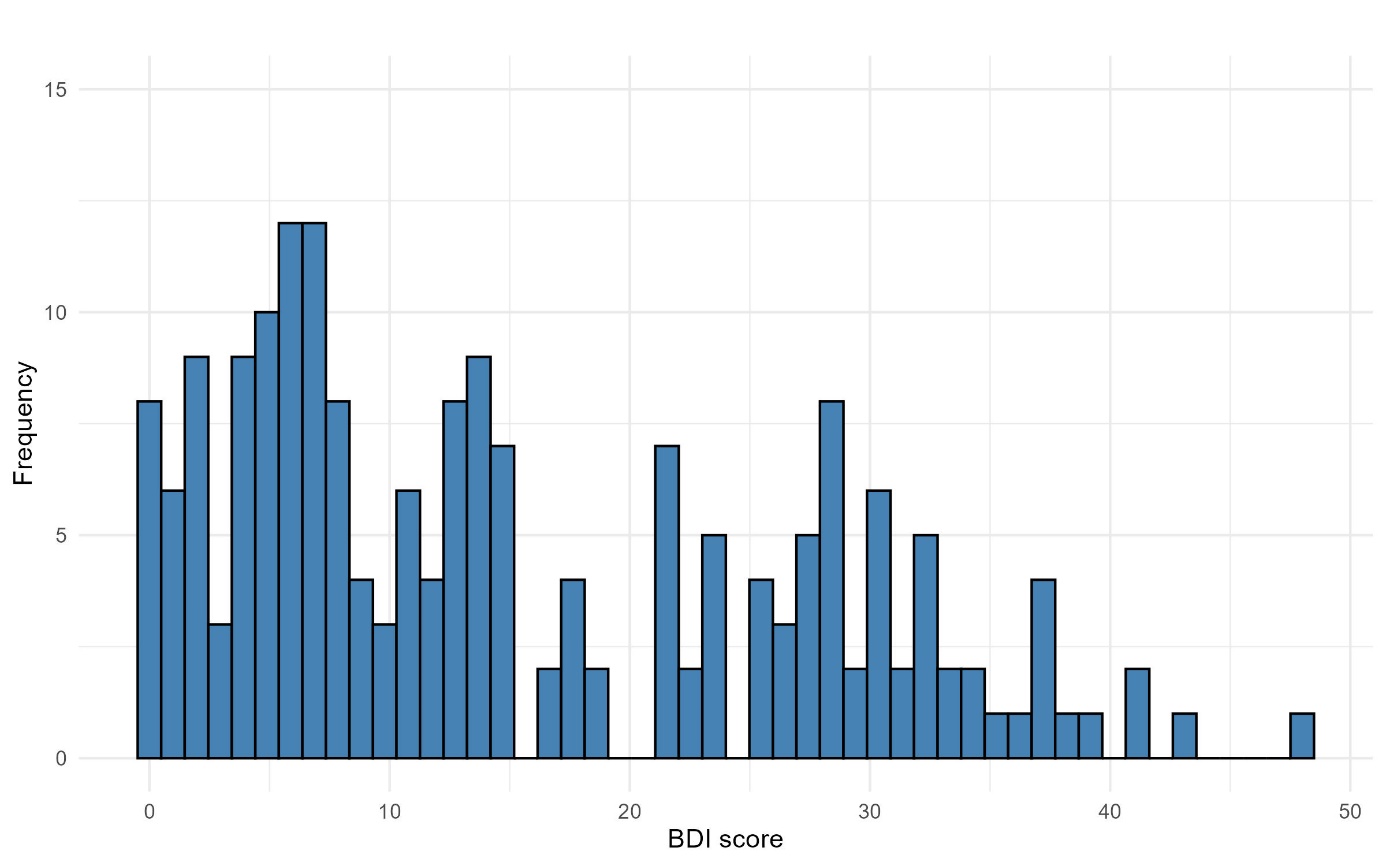


Figure S3. Histogram of depression score (Beck Depression Inventory; BDI).

### Associations of polygenic scores for depression and depression scores with neural responses

### Associations of polygenic scores for depression and neural stress responses

| **Brain structure** | |  | | **Voxel coordinates** | | | | |
| --- | --- | --- | --- | --- | --- | --- | --- | --- |
|  |  | ***k*** | **z** | | **X** | **Y** | **Z** |
| Ncl caudatus/ Ncl. accumbens | right | 11 | -4.34 | | 42 | 76 | 37 |

Table S1. Structures showing (de)activation during Scan*STRESS* for the totals sample with polygenic score for depression as covariate including cluster size, individual *z*-values and localization of peak voxels. False-discovery rate (FDR, *p* < .05) correction at *z*FDR > 3.70.

*Note*. *k* = cluster size

| **Brain structure** |  |  |  | **Voxel coordinates** | | |
| --- | --- | --- | --- | --- | --- | --- |
|  |  | ***k*** | **z** | **X** | **Y** | **Z** |
| Precuneus | right | 25 | 4.62 | 44 | 40 | 57 |

Table S2. Structures showing sex-dependent (men > women) activation during Scan*STRESS* with polygenic score for depression as covariate including cluster size, individual *z*-values and localization of peak voxels. False-discovery rate (FDR, *p* < .05) correction at *z*FDR > 4.26.

*Note*. *k* = cluster size

### Associations of depression scores and neural stress responses

Table S3. Structures showing (de)activation during Scan*STRESS* for the totals sample with depression score (BDI-II) as covariate including cluster size, individual *z*-values and localization of peak voxels. False-discovery rate (FDR, *p* < .05) correction at *z*FDR > 3.89.

| **Brain structure** |  |  |  | **Voxel coordinates** | | |
| --- | --- | --- | --- | --- | --- | --- |
|  |  | ***k*** | **z** | **X** | **Y** | **Z** |
| Supramarginal gyrus | right | 27 | 4.94 | 21 | 43 | 60 |
| Thalamus | right | 17 | 4.41 | 40 | 53 | 43 |
| Postcentral gyrus | right | 17 | 4.82 | 21 | 56 | 55 |
| Ncl. caudatus | right | 10 | 4.60 | 58 | 62 | 52 |
| Postcentral gyrus | right | 10 | 4.68 | 74 | 58 | 56 |

*Note*. *k* = cluster size

### Polygenic score for depression and time-exposure effect

Table S4. Exposure-time effect results (run 1 > run 2): Structures showing more activations (stress > control) in the first run compared to the second run of Scan*STRESS* for the totals sample with polygenic score for depression as covariate including cluster size, individual *z*-values and localization of peak voxels. False-discovery rate (FDR, *p* < .05) correction at *z*FDR > 2.36.

| **Brain structure** |  |  |  | **Voxel coordinates** | | |
| --- | --- | --- | --- | --- | --- | --- |
|  |  | ***k*** | **z** | **X** | **Y** | **Z** |
| Insula | right | 64 | 3.21 | 31 | 59 | 42 |
| Paracingulate cortex | right | 62 | 3.56 | 45 | 93 | 47 |
| Superior frontal gyrus | right | 50 | 3.30 | 46 | 77 | 65 |
| Anterior cingulate cortex (ACC) | right | 42 | 2.91 | 47 | 63 | 60 |
| Paracingulate cortex / ACC | right | 40 | 3.34 | 43 | 77 | 54 |
| Precentral gyrus | right | 39 | 3.45 | 20 | 61 | 59 |
| Fusiform gyrus | right | 29 | 3.27 | 65 | 29 | 30 |
| ACC | right | 27 | 3.10 | 50 | 85 | 47 |
| Frontal medial cortex | right | 27 | 4.09 | 46 | 82 | 25 |
| Thalamus | right | 27 | 4.09 | 46 | 82 | 25 |
| Thalamus | right | 26 | 3.79 | 45 | 54 | 39 |
| ACC | right | 19 | 2.86 | 50 | 72 | 56 |
| Thalamus | right | 18 | 2.99 | 52 | 55 | 39 |
| Inferior frontal gyrus | right | 17 | 2.98 | 19 | 77 | 46 |
| Inferior frontal gyrus | right | 17 | 3.33 | 25 | 78 | 40 |
| Superior frontal gyrus | right | 16 | 2.97 | 52 | 75 | 65 |
| ACC | right | 15 | 3.60 | 44 | 80 | 50 |
| Parahippocampus | right | 14 | 3.07 | 36 | 50 | 28 |
| Frontal pole | right | 12 | 3.23 | 54 | 83 | 29 |
| ACC | right | 11 | 3.05 | 53 | 85 | 44 |
| Thalamus | right | 10 | 3.01 | 54 | 59 | 40 |

*Note*. *k* = cluster size

Table S5. Sex-dependent Exposure-time effect results (run 1 > run 2): Structures showing sex-dependent (men > women) more activations (stress > control) in the first run compared to the second run of Scan*STRESS* with polygenic score for depression as covariate including cluster size, individual *z*-values and localization of peak voxels. False-discovery rate (FDR, *p* < .05) correction at *z*FDR > 2.36.

| **Brain structure** |  |  |  | **Voxel coordinates** | | |
| --- | --- | --- | --- | --- | --- | --- |
|  |  | ***k*** | **z** | **X** | **Y** | **Z** |
| Putamen | right | 106 | 3.52 | 36 | 71 | 38 |
| Frontal orbital cortex | right | 61 | 3.42 | 25 | 80 | 33 |
| Insula | right | 53 | 4.35 | 30 | 64 | 38 |
| Fusiform gyrus | right | 38 | 3.40 | 63 | 51 | 26 |
| Inferior frontal cortex | right | 37 | 3.27 | 24 | 71 | 41 |
| Temporal pole | right | 31 | 3.63 | 24 | 75 | 28 |
| Inferior temporal gyrus | right | 30 | 3.37 | 24 | 42 | 32 |
| Precuneus | right | 29 | 3.18 | 45 | 37 | 49 |
| Paracingulate cortex | right | 27 | 3.80 | 47 | 74 | 63 |
| Fusiform gyrus | right | 27 | 3.02 | 61 | 46 | 32 |
| Frontal pole | right | 24 | 3.06 | 34 | 94 | 50 |
| Inferior temporal gyrus | right | 24 | 3.56 | 26 | 54 | 29 |
| Fusiform gyrus | right | 24 | 3.41 | 30 | 46 | 33 |
| Parietal Operculum | right | 24 | 3.43 | 67 | 54 | 49 |
| Parahippocampus | right | 24 | 3.28 | 36 | 50 | 31 |
| Hippocampus | right | 24 | 3.32 | 37 | 59 | 28 |
| Posterior cingulate cortex (PCC) | right | 23 | 3.48 | 50 | 56 | 56 |
| Insula | right | 23 | 3.69 | 31 | 70 | 35 |
| Frontal pole | right | 22 | 3.57 | 33 | 96 | 42 |
|  | right | 22 | 2.85 | 50 | 63 | 64 |
| Parietal operculum | right | 21 | 3.22 | 74 | 55 | 47 |
| Superior temporal gyrus | right | 20 | 3.53 | 77 | 54 | 40 |
| Thalamus | right | 18 | 2.93 | 42 | 56 | 39 |
| Fusiform gyrus | right | 17 | 3.12 | 29 | 31 | 30 |
| Middle temporal gyrus | right | 16 | 3.43 | 15 | 55 | 28 |
| Fusiform gyrus | right | 15 | 2.70 | 63 | 41 | 31 |
| Frontal pole | right | 15 | 4.28 | 44 | 101 | 42 |
| Ncl. caudatus | right | 15 | 2.74 | 56 | 74 | 43 |
| Frontal pole | right | 14 | 2.84 | 74 | 84 | 37 |
| Superior temporal gyrus | right | 14 | 2.89 | 14 | 48 | 42 |
| Parietal Operculum | right | 14 | 2.93 | 70 | 50 | 49 |
| Anterior cingulate cortex (ACC) | right | 13 | 2.90 | 45 | 85 | 42 |
| Insula | right | 13 | 2.95 | 69 | 60 | 44 |
| Middle temporal gyrus | right | 12 | 3.42 | 20 | 41 | 34 |
| Frontal pole | right | 12 | 3.07 | 61 | 95 | 48 |
| Inferior temporal gyrus | right | 11 | 3.03 | 21 | 45 | 33 |
| Superior frontal gyrus | right | 10 | 3.33 | 54 | 73 | 68 |
| Frontal pole | right | 10 | 2.91 | 30 | 91 | 53 |
| Frontal orbital cortex | right | 10 | 2.65 | 31 | 77 | 34 |
| Parahippocampus | right | 10 | 2.64 | 37 | 66 | 31 |
| Caudatus | Right | 10 | 2.72 | 40 | 70 | 46 |

*Note*. *k* = cluster size
